# Supplementary material for: Polyglycine Acts as a Rejection Signal for Protein Transport at the Chloroplast Envelope
Source: PubMed Central journal article supplement (PMC5147994; doi:10.1371/journal.pone.0167802), 2016-12-09
Supplement: pone.0167802.s001.pdf [file pone.0167802.s001.pdf]

### SI Table. Primers used for cloning.

Sequences are from 5' to 3'. Substituted nucleotides were indicated with capital characters.

---

|                                                                                                    |                                                                      |
|----------------------------------------------------------------------------------------------------|----------------------------------------------------------------------|
| For subcloning of t75 and t75 <sub>Δ86-103</sub> from pET23-pr75 to prepare pET23-t75-mSS variants |                                                                      |
| Forward                                                                                            | TGCCATGGGTACTTCCGTTATTC ( <i>NcoI</i> site is underlined)            |
| Reverse                                                                                            | CCTCGAGCATGCATGATTTTGGTTCGTCGGCGAT ( <i>SphI</i> site is underlined) |

---

|                                                                                           |                                                           |
|-------------------------------------------------------------------------------------------|-----------------------------------------------------------|
| For generation of pET23-pr75 <sub>Δ86-103</sub>                                           |                                                           |
| For 5'-fragment encoding residues 1-85 of psToc75 and <i>NdeI</i> and <i>BamHI</i> sites. |                                                           |
| Forward                                                                                   | CCATATGGGTACTTCCGTTATTC ( <i>NdeI</i> site is underlined) |
| Reverse                                                                                   | GGGATCCAGAAAAATTAGGGA ( <i>BamHI</i> site is underlined)  |

---

|                                                                                    |                                                             |
|------------------------------------------------------------------------------------|-------------------------------------------------------------|
| For 3'-fragment encoding residues 100-125 and <i>BamHI</i> and <i>EcoRI</i> sites. |                                                             |
| Forward                                                                            | TTCATCTGGATCCGGAGGCGGT ( <i>BamHI</i> site is underlined)   |
| Reverse                                                                            | GGATAGAATTCTCGACCAGAACGA ( <i>EcoRI</i> site is underlined) |

---

|                                                         |                                                                     |
|---------------------------------------------------------|---------------------------------------------------------------------|
| For subcloning of t75 and t75 <sub>GGA</sub> into pB-CG |                                                                     |
| Forward                                                 | TAACTAGTATGCGTACTTCCGTTATTCCC ( <i>SpeI</i> site is underlined)     |
| Reverse                                                 | TAAGATCTCGAATCCCAATCTTCTGATTTTGG ( <i>BglII</i> site is underlined) |

---

|                                                                                 |                                |
|---------------------------------------------------------------------------------|--------------------------------|
| For subcloning of t75-EGFP and t75 <sub>GGA</sub> -EGFP from pB-CG to pGEMTEasy |                                |
| Forward                                                                         | TAACTAGTATGCGTACTTCCGTTATTCCC  |
| Reverse                                                                         | CGAGATCAGTTATCTAGATCCGGTGGATCC |

---
