# Supplementary material for: Polyglycine Acts as a Rejection Signal for Protein Transport at the Chloroplast Envelope
Source: PubMed Central journal article supplement (PMC5147994; doi:10.1371/journal.pone.0167802), 2016-12-09
Supplement: pone.0167802.s003.pdf [file pone.0167802.s003.pdf]

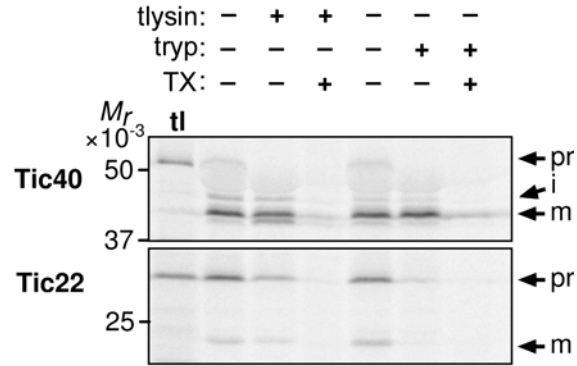

**S2 Fig. Import of Tic22 and Tic40 into isolated chloroplasts followed by protease treatments.**

Radiolabeled precursors of proteins indicated at left were imported into isolated chloroplasts and their sensitivity to thermolysin (tlysin) or trypsin (tryp) with or without the presence of 1% Triton X-100 (TX) was analyzed as described in the legend to Fig 2B. Proteins were visualized by phosphorimaging. pr, i, and m indicate precursor, intermediate, and mature forms, respectively. The experiments were done concurrently with those shown in Figs 2B and 3B.
