# Supplementary material for: Polyglycine Acts as a Rejection Signal for Protein Transport at the Chloroplast Envelope
Source: PubMed Central journal article supplement (PMC5147994; doi:10.1371/journal.pone.0167802), 2016-12-09
Supplement: pone.0167802.s006.pdf [file pone.0167802.s006.pdf]

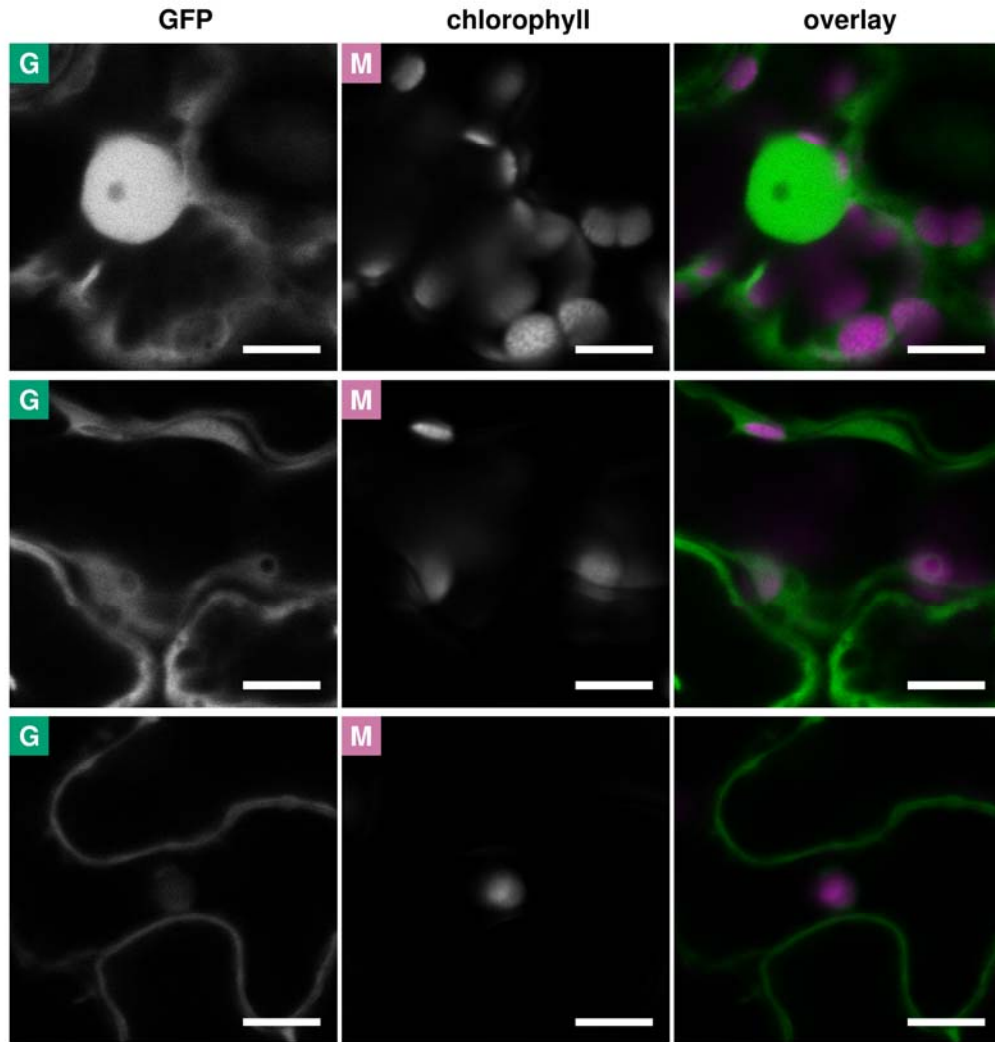

**S5 Fig. Confocal microscopy analysis of *N. benthamiana* leaves transiently expressing t75-EGFP at higher magnification.**

Leaves of *N. benthamiana* expressing t75-EGFP visualized at 5× zoom. Scale bars represent 10 μm.
