# Supplementary material for: Polyglycine Acts as a Rejection Signal for Protein Transport at the Chloroplast Envelope
Source: PubMed Central journal article supplement (PMC5147994; doi:10.1371/journal.pone.0167802), 2016-12-09
Supplement: pone.0167802.s008.pdf [file pone.0167802.s008.pdf]

>t75-mSS

MGTSVIPNRL TPTLTTHPSR RRNDHITTRT SSLKCHLSPS SGDNND SFNS SLLKTISTTV- 60  
AVSSAAASAF FLTGSLHSPF PNFSGLNAAA GGGAGGGGGG SSSSGGGGGG WFNGDEGSFW-120  
SRILSPARAI ADEPKSCMQV WPPIGKKKFE TLSYLPPLTR DQLLKEVEYL LRKGVPCLE-180  
FELEKGFVYR EHNKSPGYD GRYWTMWKLP MFGTTDASQV LKELDEVVAA YPQAFVRIIG-240  
FDNVRQVQCI SFIAHTPESY *LEHHHHHH*-278

>t75-EGFP

MRTSVIPNRL TPTLTTHPSR RRNDHITTRT SSLKCHLSPS SGDNND SFNS SLLKTISTTV- 60  
AVSSAAASAF FLTGSLHSPF PNFSGLNAAA GGGAGGGGGG SSSSGGGGGG WFNGDEGSFW-120  
SRILSPARAI ADEPKSEDWD SRSAAAAAAA *AAAGPVATMV* SKGEELFTGV VPILVELDGD-180  
VNGHKFSVSG EGECDATYVK LTLKFICTTG KLPVPWPTLV TTLTYGVQCF SRYPDHMKQH-240  
DFFKSAMPEG YVQERTIFFK DDGNYKTRAE VKFEGDTLVN RIELKGIDFK EDGNILGHKL-300  
EYNYNSHNVI IMADKQKNGI KVNFKIRHNI EDGSVQLADH YQNTPIGDG PVLLPDNHYL-360  
STQSALSNDP NEKRDHMLL EFVTAAGITL *GMDELYK*-397

**S7 Fig. The primary sequences of t75-mSS and t75-EGFP variants.**

In both sequences, the N-terminal 35 residues corresponding to n75 are in the shaded box. In the t75-mSS sequence, residues deleted in t75<sub>Δ86-103</sub> are double-underlined, the N-terminal five residues of mature psToc75 are underlined, and C-terminal six His residues derived from the pET23 vector are italicized. In the t75-EGFP sequence, the residues replaced with tri-Ala in the t75<sub>GGA</sub>-EGFP are double-underlined, the N-terminal 10 residues of mature Toc75 are underlined, and the 17 residues derived from a linker N terminus to EGFP in pB-CG are italicized.
