# Supplementary material for: Polyglycine Acts as a Rejection Signal for Protein Transport at the Chloroplast Envelope
Source: PubMed Central journal article supplement (PMC5147994; doi:10.1371/journal.pone.0167802), 2016-12-09
Supplement: pone.0167802.s009.pdf [file pone.0167802.s009.pdf]

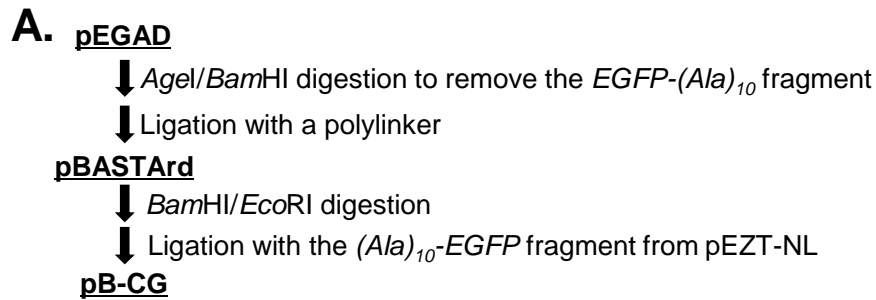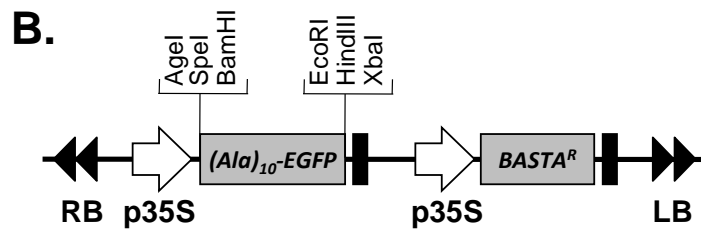

**S8 Fig. Preparation of pB-CG.**

(a) A schematic showing the construction of pB-CG. The fragment encoding *EGFP-(Ala)<sub>10</sub>* in pEGAD plasmid [Cutler, S. R., Ehrhardt, D. W., Griffiths, J. S. and Somerville, C. R. (2000) Random GFP::cDNA fusions enable visualization of subcellular structures in cells of Arabidopsis at a high frequency. Proc. Natl. Acad. Sci. U S A. **97**, 3718-3723] was removed by digestion with *AgeI* and *BamHI* followed by ligation to a polylinker cassette made of two oligonucleotides with a *BamHI* site (double underlined) (5'-CCGGTACTAGTGGATCCCCGGGGAATTCAAGCTTA-3' and 5'-GATCTAAGCTTGAATTCCCCGGGGATCCACTAGTA-3'), yielding pBASTArd. During this ligation, the *BamHI* site (GGATCC) 3' to the *EGFP-(Ala)<sub>10</sub>* coding sequence in pEGAD was replaced by GGATCT. A sequence encoding *(Ala)<sub>10</sub>-EGFP* was amplified by PCR using pEZT-NL (<http://deepgreen.stanford.edu/>) and the following set of primers (the forward primer including a *BamHI* site as underlined:

5'-AAGGATCCGCTGCTGCCGCTGCCGCTGCCGAGCGGCCGACCGGTCGCCACCATG-3';

and the reverse primer including *EcoRI* site as underlined

5'-AAGAATTCTTACTTGTACAGCTCGTCCATGCC-3'). The resultant fragment was subcloned into pBASTArd using the *BamHI* and *EcoRI* sites, yielding pB-CG.

(b) The T-DNA region of pB-CG. Right and left borders (RB and LB), CaMV35S promoters (p35S), the *basta* herbicide resistance locus (*BASTA<sup>R</sup>*), and the terminator (black box), all of which originated from pEGAD, are indicated.
